# Supplementary material
Source: publisher figshare collection journal article supplement (https://tandf.figshare.com/ndownloader/files/17281751)
Supplement: Supplementary file 1 [file 17281751]

**Supporting Information**

**Synthesis and characterization of（Fe、Co、Ni）-polyoxometalates to degrade** **O, O-diethyl-S-(p-tolyl) phosphorothioate under visible light irradiation**

Yanghao Yan, Xiaoya Wang, Muhammad Asim Khan, Mingzhu Xia*, Wu Lei, Fengyun Wang*

School of Chemical Engineering, Nanjing University of Science and Technology, Nanjing 210094, PR. China

E-mail: [ind_chem@njust.edu.cn](mailto:wangfy@njust.edu.cn), (F. Wang), [xiamzh196808@njust.edu.cn](mailto:xiamzh196808@njust.edu.cn) (M. Xia)

The following are the results of ICP spectroscopy and theoretical calculations for the four catalysts [21].

Elemental analysis of (TBA)4[PW11Fe(H2O)O39]·2H2O: W, 53.6; P, 0.88; Fe, 1.48; C, 20.15; H, 3.90; N, 1.35; H2O, 0.8; Calculated: W, 53.8; P, 0.82; Fe, 1.49; C, 20.46; H, 4, 02; N, 1.49; H2O, 0.96.

Elemental analysis of (TBA)4[PW11Co(H2O)O39]·2H2O: W, 53.3; P, 0.81; Co, 1.49; C, 20.23; H, 3.92; N, 1.36; H2O, 0.9; Calculated: W, 53.8; P, 0.82; Co, 1.57; C, 20.44; H,, 4.05; N, 1.49; H2O, 0.96.

Elemental analysis of (TBA)4H[PW11Ni(H2O)O39]·H2O: W, 53.0; P, 0.81; Ni, 1.53; C, 20.97; H, 3.97; N, 1.62; H2O, 0.5; Calculated: W, 54.0; P, 0.83; Ni, 1.57; C, 20.54; H, 4.01; N, 1.50; H2O, 0.48.

Elemental analysis of (TBA)4H3 [PW11O39]: C, 21.4; H, 3.8; N, 1.5. Calculated: C, 21.1; H, 4.1; N, 1.5%.

**NMR analysis**


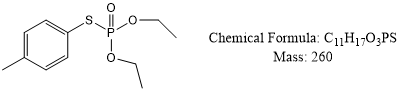


O,O-diethyl S-(p-tolyl) phosphorothioate. 1H NMR (500 MHz, Chloroform-d) δ 7.42 (dd, J = 8.3, 2.2 Hz, 2H), 7.13 (d, J = 7.9 Hz, 2H), 4.28 – 4.06 (m, 4H), 2.32 (d, J = 2.0 Hz, 3H), 1.34 – 1.19 (m, 6H). 13C NMR (126 MHz, Chloroform-d) δ 138.34 , 133.66 , 133.62 , 129.19 , 121.78 , 63.05 , 63.00 , 20.22 , 15.08 , 15.02 .GC-MS (EI) m/z: 239.


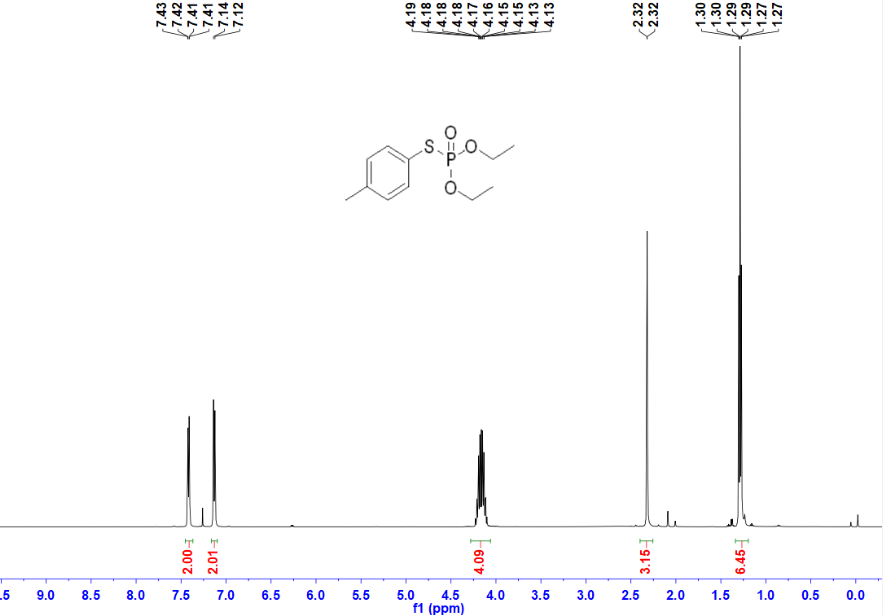


Figure S1. 1H spectrum of O,O-diethyl-S-(p-tolyl) phosphorothioate


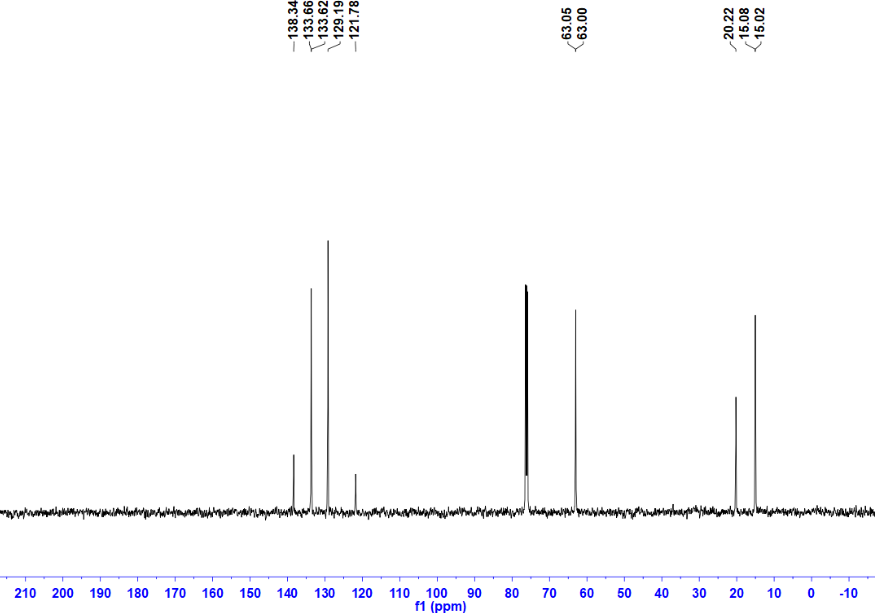


Figure S2. 13C spectrum of O,O-diethyl S-(p-tolyl) phosphorothioate.
